# Supplementary material
Source: PubMed Central journal article supplement (PMC4964906)
Supplement: NIHMS68061-supplement-Appendix_1.pdf [file NIHMS68061-supplement-Appendix_1.pdf]

### Appendix 1. Search Strategy

#### Combine box A and box B using AND

##### BOX A

Deming.ti,ab, 6 sigma.mp. , (Six adj1 sigma).mp Lean adj1 sigma).mp. , Measurement for improvement.ti,ab, (quality adj2 improv\$.ti,ab., (quality adj1 management).ti,ab., (improv\$ adj2 science).ti,ab., (process adj2 improv\$.ti,ab, (Plan and do and study).ti,ab., PDCA.ti,ab, pdsa.ti,ab., plan do check.ti,ab, (method adj2 improv\$.ti,ab, health.mp. and behavioural economics.ti,ab, operations research.ti,ab, decision science.ti,ab, Shewhart.ti,ab., Pareto chart.ti,ab, Statistical process control.mp., Statistical quality control.mp, Toyota.mp., Paretochart\$.mp, Control chart.mp.

##### BOX B

preoperative.mp., Peri-operative.mp., surg\$.ti,ab, exp General Surgery/, exp Surgical Procedures, Operative/, Operative Time/, Peri-operative.ti,ab., Perioperative.ti,ab., Pre-operative.ti,ab, Operative.ti,ab. Cancer\$.mp., enhanced recovery.ti,ab., eras.ti,ab., rapid recovery.ti,ab., fast.mp. and track.ti,ab., Operating theatre.mp, Operating room.mp, Operating room\$.mp, Anesthe\$.mp, Anaesthe\$.mp, Trauma.mp.

#### Combine using AND to either BOX C or BOX D

##### BOX C: Quantitative terms

Radnomized.ti,ab, Randomi?ed controlled trial.pt., Randomized controlled trial.pt, controlled clinical trial.pt., Randomized controlled trials.sh., random allocation.sh., double blind method.sh., single-blind method.sh., Single?blind method.sh, clinical trial.pt., exp clinical trial/, (clinic\$ adj25 trial\$.ti,ab., ((singl\$ or doubl\$ or trebl\$ or tripl\$) adj25 (blind\$ or mask\$)).ti,ab., placebos.sh., placebo\$.ti,ab., comparative study.sh., exp evaluation studies/, prospective studies.sh., (control\$ or prospective\$ or volunteer\$ or retrospective\$.ti,ab., interrupted time?series, Time-series.ti,ab, Repeated measure\$.mp. , Cohort.mp., "Case?control".mp., "case control".mp. , (assess\$ adj3 process quality).mp, (evaluat\$ adj3 process quality).mp., compliance.ti,ab., quality control.mp, Process control.ti,ab, Control chart\*.ti,ab, Adherence OR adherence.ti,ab, group adj3 compar\*.mp, Control.ti,ab, Before adj2 after.mp., eval.\$.ti,ab, Variability OR variation OR variable.mp., Checklist\$.mp.

##### BOX D: Qualitative terms

Qualitative.ti,ab. , Focus Groups.mp. or exp Focus Groups/, exp Interview/ or interview.mp. , Interviews as Topic.mp. or exp Interviews as Topic/, ethnograph\$.mp. , content analysis.mp. , grounded theory.mp, grounded approach.mp. , exp Qualitative Research/ or qualitative.mp. , Phenomenolog\$.mp. , discourse analysis.mp. , constant comparison.mp., observational method.mp , theoretical sampl\$.mp. , thematic analys?s.mp. , improvement report\$.mp.

The search strategy was designed to capture terms relating to (1) surgery, (2) quality improvement, and (3) methodology.

Online Only Content 

| <b>Appendix 2. Study Design and Country of Publication Frequency for the 100 Perioperative Quality Improvement Articles</b> |                        |
|-----------------------------------------------------------------------------------------------------------------------------|------------------------|
| <b>Study Design</b>                                                                                                         | <b>No. of Articles</b> |
| Uncontrolled before and after (including statistical process control studies)                                               | 85                     |
| Nonrandomized controlled interventional study                                                                               | 4                      |
| Cluster randomized trial                                                                                                    | 4                      |
| Randomized controlled trial                                                                                                 | 2                      |
| Case series                                                                                                                 | 2                      |
| Time series or segmented time series                                                                                        | 2                      |
| Cohort                                                                                                                      | 1                      |
| <b>Country of Publication</b>                                                                                               | <b>No. of Articles</b> |
| United States                                                                                                               | 67                     |
| Netherlands                                                                                                                 | 7                      |
| United Kingdom                                                                                                              | 5                      |
| Germany                                                                                                                     | 4                      |
| Australia                                                                                                                   | 3                      |
| Norway                                                                                                                      | 3                      |
| Finland                                                                                                                     | 1                      |
| Taiwan                                                                                                                      | 1                      |
| Iran                                                                                                                        | 1                      |
| Africa                                                                                                                      | 1                      |
| Turkey                                                                                                                      | 1                      |
| Colombia                                                                                                                    | 1                      |
| China                                                                                                                       | 1                      |
| India                                                                                                                       | 1                      |
| Switzerland                                                                                                                 | 1                      |
| France                                                                                                                      | 1                      |
| Italy                                                                                                                       | 1                      |

**Online Only Content** 

| <b>Appendix 3. The 100 Perioperative Quality Improvement Articles, Classified According to Targeted Clinical Issue*</b>                                                |                        |
|------------------------------------------------------------------------------------------------------------------------------------------------------------------------|------------------------|
| <b>Intended Clinical Outcome</b>                                                                                                                                       | <b>No. of Articles</b> |
| Reduce postoperative complications—VTE                                                                                                                                 | 1                      |
| Improve postoperative process—organizational (e.g., discharge process, complication reporting)                                                                         | 3                      |
| Improve self-management/patient and family satisfaction                                                                                                                | 3                      |
| Reduce postoperative error (e.g., medication errors, unnecessary tests)                                                                                                | 4                      |
| Reduce postoperative complications—pain and sedation                                                                                                                   | 5                      |
| Improve preoperative process (e.g., fasting, admissions documentation)                                                                                                 | 9                      |
| Improve intraoperative process—organizational (e.g., start time, waiting time between cases)                                                                           | 12                     |
| Reduce postoperative complications—general (e.g., hyponatremia, leak rate, lengthy intubation)                                                                         | 15                     |
| Improve intraoperative process—clinical (e.g., operative technique, never event)                                                                                       | 18                     |
| Reduce postoperative complications—infection                                                                                                                           | 30                     |
| VTE, venous thromboembolism.                                                                                                                                           |                        |
| * Each article was assigned to the category that represents the targeted clinical issue; some articles may also have addressed one or more of the other listed issues. |                        |

Appendix 4. References

| Author                 | Year/ID           | Country           | Journal                            | Title                                                                                                                                                                 |
|------------------------|-------------------|-------------------|------------------------------------|-----------------------------------------------------------------------------------------------------------------------------------------------------------------------|
| Adams R, et al.        | 2004;34:140–148   | United States     | <i>J Nurs Adm.</i>                 | Decreasing turnaround time between general surgery cases: A Six Sigma initiative.                                                                                     |
| Aletti GD, et al.      | 2009;208:614–620  | United States     | <i>J Am Coll Surg.</i>             | Quality improvement in the surgical approach to advanced ovarian cancer: The Mayo Clinic experience.                                                                  |
| Arbour R.              | 2003;34:64-71     | United States     | <i>J Contin Educ Nurs.</i>         | A continuous quality improvement approach to improving clinical practice in the areas of sedation, analgesia, and neuromuscular blockade.                             |
| Baker RA, Newland RF.  | 2008;23:7–16      | Australia         | <i>Perfusion.</i>                  | Continuous quality improvement of perfusion practice: The role of electronic data collection and statistical control charts.                                          |
| Berenholtz SM, et al.  | 2004;32:2014–2020 | United States     | <i>Crit Care Med.</i>              | Eliminating catheter-related bloodstream infections in the intensive care unit.                                                                                       |
| Berry SA, et al.       | 2009;18:360–368   | United States     | <i>Qual Saf Health Care.</i>       | ProvenCare: Quality improvement model for designing highly reliable care in cardiac surgery.                                                                          |
| Bertolaccini L, et al. | 2011;39:e128–132  | Italy             | <i>Eur J Cardithorac Surg.</i>     | ‘Six sigma approach’—An objective strategy in digital assessment of postoperative air leaks: A prospective randomised study.                                          |
| Blackmore CC, et al.   | 2013;39:99–105    | United States     | <i>Jt Comm J Qual Patient Saf.</i> | Applying Lean methods to improve quality and safety in surgical sterile instrument processing.                                                                        |
| Bloos F, et al.        | 2009;103:232–237  | Germany           | <i>Br J Anaesth.</i>               | Effects of staff training on the care of mechanically ventilated patients: A prospective cohort study.                                                                |
| Bosse G, et al.        | 2013;8(6):e65428  | Africa (Tanzania) | <i>PLoS One.</i>                   | Immediate outcome indicators in perioperative care: A controlled intervention study on quality improvement in hospitals in Tanzania.                                  |
| Brackbill ML, et al.   | 2010;16:329–336   | United States     | <i>J Manag Care Pharm.</i>         | Intervention to increase the proportion of acute myocardial infarction or coronary artery bypass graft patients receiving an order for aspirin at hospital discharge. |
| Brattebø G, et al.     | 2004;13:203–205   | Norway            | <i>Qual Saf Health Care.</i>       | Effect of a scoring system and protocol for sedation on duration of patients’ need for ventilator support in a surgical intensive care unit.                          |
| Brush JE Jr, et al.    | 2006;152:379–385  | United States     | <i>Am Heart J.</i>                 | Implementation of a continuous quality improvement program for percutaneous coronary intervention and cardiac surgery at a large community hospital.                  |
| Burkitt KH, et al.     | 2009;15:633–642   | United States     | <i>Am J Manag Care.</i>            | Toyota production system quality improvement initiative improves perioperative antibiotic therapy.                                                                    |
| Camp SL, et al.        | 2009;24:414–423   | United States     | <i>J Card Surg.</i>                | Quality improvement program increases early tracheal extubation rate and decreases pulmonary complications and resource utilization after cardiac surgery.            |
| Celik J.               | 2003;77:737–741   | United States     | <i>AORN J.</i>                     | Decreasing preoperative delays—A rapid process improvement project.                                                                                                   |
| Ceppa EP, et al.       | 2013;15:384–391   | United States     | <i>HPB (Oxford).</i>               | Reducing surgical site infections in hepatopancreatobiliary surgery.                                                                                                  |

(continued on page AP5)

Appendix 4. References (continued)

| Author                                  | Year/ID           | Country         | Journal                            | Title                                                                                                                                                                 |
|-----------------------------------------|-------------------|-----------------|------------------------------------|-----------------------------------------------------------------------------------------------------------------------------------------------------------------------|
| Cima RR, et al.                         | 2013;216: 23–133  | United States   | <i>J Am Coll Surg.</i>             | Colorectal surgery surgical site infection reduction program: A national surgical quality improvement program–driven multidisciplinary single-institution experience. |
| Cima RR, et al.                         | 2011;213:83–92    | United States   | <i>J Am Coll Surg.</i>             | Use of Lean and Six Sigma methodology to improve operating room efficiency in a high-volume tertiary-care academic medical center.                                    |
| Cima RR, et al.                         | 2009;35:123–132   | United States   | <i>Jt Comm J Qual Patient Saf.</i> | A multidisciplinary team approach to retained foreign objects.                                                                                                        |
| Collar RM, et al.                       | 2012;214:928–936  | United States   | <i>J Am Coll Surg.</i>             | Lean management in academic surgery                                                                                                                                   |
| Crolla RM, et al.                       | 2012;7(9):e44599  | The Netherlands | <i>PLoS One.</i>                   | Reduction of surgical site infections after implementation of a bundle of care.                                                                                       |
| Cronin J, et al.                        | 2011;77:1305–1308 | United States   | <i>Am Surg.</i>                    | Quality improvement pilot program for vulnerable elderly surgical patients.                                                                                           |
| Does RJM, et al.                        | 2009;41:95–109    | The Netherlands | <i>J Qual Technol.</i>             | Reducing start time delays in operating rooms                                                                                                                         |
| Duclos A, et al.                        | 2009;96:171–174   | France          | <i>Br J Surg.</i>                  | Quality monitoring in thyroid surgery using the Shewhart control chart.                                                                                               |
| Duncan F, Haigh C.                      | 2013;22:2748–2757 | United Kingdom  | <i>J Clin Nurs.</i>                | Measuring and improving the quality of postoperative epidural analgesia for major abdominal surgery using statistical process control charts.                         |
| Dyrkorn OA, Kristoffersen M, Walberg M. | 2012;21:206–210   | Norway          | <i>BMJ Qual Saf.</i>               | Reducing post-caesarean surgical wound infection rate: An improvement project in a Norwegian maternity clinic.                                                        |
| Edel, EM.                               | 2012;95:228–238   | United States   | <i>AORN J.</i>                     | Surgical count practice variability and the potential for retained surgical items.                                                                                    |
| Erdek MA, Pronovost PJ                  | 2004;16:59–64     | United States   | <i>Int J Qual Health Care.</i>     | Improving assessment and treatment of pain in the critically ill.                                                                                                     |
| Ferguson TB Jr, et al.                  | 2003;290:49–56    | United States   | <i>JAMA.</i>                       | Use of continuous quality improvement to increase use of process measures in patients undergoing coronary artery bypass graft surgery: A randomized controlled trial. |
| Forster DH, et al.                      | 2000;45:302–310   | Germany         | <i>J Hosp Infect.</i>              | Can quality circles improve hospital-acquired infection control?                                                                                                      |
| Frankel HL, et al.                      | 2005;201:349–358  | United States   | <i>J Am Coll Surg.</i>             | Use of corporate Six Sigma performance-improvement strategies to reduce incidence of catheter-related bloodstream infections in a surgical ICU.                       |
| Goodney PP, Chang RW, Cronenwett JL.    | 2008;48:1481–1488 | United States   | <i>J Vasc Surg.</i>                | A percutaneous arterial closure protocol can decrease complications after endovascular interventions in vascular surgery patients.                                    |
| Gray JR, et al.                         | 2010;25:248–254   | United States   | <i>J Nurs Care Qual.</i>           | Elimination of excess preoperative wait time and its impact on immediate clinical outcomes among patients undergoing spinal surgery.                                  |

(continued on page AP6)

Appendix 4. References (continued)

| Author                                           | Year/ID            | Country         | Journal                          | Title                                                                                                                                                          |
|--------------------------------------------------|--------------------|-----------------|----------------------------------|----------------------------------------------------------------------------------------------------------------------------------------------------------------|
| Haessler S, et al.                               | 2010;110:1044–1048 | United States   | <i>Anesth Analg.</i>             | A surgical site infection cluster: The process and outcome of an investigation—The impact of an alcohol-based surgical antiseptics product and human behavior. |
| Holman WL, et al.                                | 2001;285:3003–3010 | United States   | <i>JAMA.</i>                     | Alabama coronary artery bypass grafting project: Results of a statewide quality improvement initiative.                                                        |
| Houston S, et al.                                | 2003;12:28–41      | United States   | <i>Qual Manag Health Care.</i>   | Reducing the incidence of nosocomial pneumonia in cardiovascular surgery patients.                                                                             |
| Huffines M, et al.                               | 2013;33:56–69      | United States   | <i>Crit Care Nurse.</i>          | Improving family satisfaction and participation in decision making in an intensive care unit.                                                                  |
| Iannettoni MD, et al.                            | 2011;91:1011–1017  | United States   | <i>Ann Thorac Surg.</i>          | Kaizen method for esophagectomy patients: Improved quality control, outcomes, and decreased costs.                                                             |
| Jatla KK, Enzenauer RW.                          | 2007;14:149–154    | United States   | <i>J Clin Outcomes Manag.</i>    | The application of statistical process control to cataract surgery.                                                                                            |
| Kanter G, Connelly NR, Fitzgerald J.             | 2006;103:1517–1521 | United States   | <i>Anesth Analg.</i>             | A system and process redesign to improve perioperative antibiotic administration.                                                                              |
| Kreckler S, et al.                               | 2013;22:916–922    | United Kingdom  | <i>BMJ Qual Saf.</i>             | Effective prevention of thromboembolic complications in emergency surgery patients using a quality improvement approach.                                       |
| Kritchevsky SB, et al.                           | 2008;149:472–480   | United States   | <i>Ann Intern Med.</i>           | The effect of a quality improvement collaborative to improve antimicrobial prophylaxis in surgical patients: A randomized trial.                               |
| Larochelle M, et al.                             | 2011;54:394–400    | United States   | <i>Dis Colon Rectum.</i>         | Diminishing surgical site infections after colorectal surgery with Surgical Care Improvement Project: Is it time to move on?                                   |
| Leaphart CL, et al.                              | 2012;177:7–13      | United States   | <i>J Surg Res.</i>               | Formal quality improvement curriculum and DMAIC method results in interdisciplinary collaboration and process improvement in renal transplant patients.        |
| Lee KK, et al.                                   | 2013;56:1298–1303  | United States   | <i>Dis Colon Rectum.</i>         | Building a business case for colorectal surgery quality improvement.                                                                                           |
| Loor G, et al.                                   | 2013;146:1028–1032 | United States   | <i>J Thorac Cardiovasc Surg.</i> | Process improvement in cardiac surgery: Development and implementation of a reoperation for bleeding checklist.                                                |
| Lu Y, et al.                                     | 2013;53:3080–3087  | China           | <i>Transfusion.</i>              | Failure mode and effect analysis in blood transfusion: A proactive tool to reduce risks.                                                                       |
| Lutfiyya W, Parsons D, Breen J.                  | 2012;16(3):10–16   | United States   | <i>Perm J.</i>                   | A colorectal “care bundle” to reduce surgical site infections in colorectal surgeries: A single-center experience.                                             |
| Marang-van de Mheen PJ, Stadlander MC, Kievit J. | 2006;15:320–324    | The Netherlands | <i>Qual Saf Health Care.</i>     | Adverse outcomes in surgical patients: Implementation of a nationwide reporting system.                                                                        |
| Mazaleski A.                                     | 2011;30:361–364    | United States   | <i>Orthop Nurs.</i>              | Postoperative total joint replacement class for support persons: Enhancing patient and family centered care using a quality improvement model.                 |

(continued on page AP7)

Appendix 4. References (continued)

| Author                              | Year/ID                 | Country         | Journal                        | Title                                                                                                                                                                                              |
|-------------------------------------|-------------------------|-----------------|--------------------------------|----------------------------------------------------------------------------------------------------------------------------------------------------------------------------------------------------|
| McCahill LE, et al.                 | 2007;142:355–361        | United States   | <i>Arch Surg.</i>              | Enhancing compliance with Medicare guidelines for surgical infection prevention: Experience with a cross-disciplinary quality improvement team.                                                    |
| McCulloch P, et al.                 | 2010;341:c5469          | United Kingdom  | <i>BMJ.</i>                    | Effect of a “Lean” intervention to improve safety processes and outcomes on a surgical emergency unit.                                                                                             |
| Meissner W, Ullrich K, Zwacka S.    | 2006;23:142–148         | Germany         | <i>Eur J Anaesthesiol.</i>     | Benchmarking as a tool of continuous quality improvement in postoperative pain management.                                                                                                         |
| Merlani P, et al.                   | 2001;323:620–624        | Switzerland     | <i>BMJ.</i>                    | Quality improvement report: Linking guideline to regular feedback to increase appropriate requests for clinical tests: Blood gas analysis in intensive care. [Erratum in <i>BMJ</i> 2001;323:993.] |
| Navipour H, et al.                  | 2011;49:38–43           | Iran            | <i>Acta Med Iran.</i>          | An investigation into the effects of quality improvement method on patients’ satisfaction: A semi experimental research in Iran.                                                                   |
| Newland RF, Baker RA, Stanley R.    | 2006;38:139–143         | Australia       | <i>J Extra Corpor Technol.</i> | Electronic data processing: The pathway to automated quality control of cardiopulmonary bypass. [Erratum in <i>J Extra Corpor Technol.</i> 2006;38:370.]                                           |
| Niemeijer GC, et al.                | 2010;69:614–618         | The Netherlands | <i>J Trauma.</i>               | Quality in trauma care: Improving the discharge procedure of patients by means of Lean Six Sigma.                                                                                                  |
| Parker BM, et al.                   | 2007;104:140–146        | United States   | <i>Anesth Analg.</i>           | Six Sigma methodology can be used to improve adherence for antibiotic prophylaxis in patients undergoing noncardiac surgery.                                                                       |
| Parks JK, et al.                    | 2008;65:1098–1104       | United States   | <i>J Trauma.</i>               | Dissecting delays in trauma care using corporate Lean Six Sigma methodology.                                                                                                                       |
| Pronovost PJ, et al.                | 2002;28:595–604         | United States   | <i>Jt Comm J Qual Improv.</i>  | Reducing failed extubations in the intensive care unit.                                                                                                                                            |
| Ramsey C, Ormsby S, Marsh T.        | 2001;Suppl:2–6          | United States   | <i>Healthc Financ Manage.</i>  | Performance-improvement strategies can reduce costs.                                                                                                                                               |
| Rao N, et al.                       | 2004;26:22–27           | United States   | <i>J Healthc Qual.</i>         | Prevention of postoperative mediastinitis: A clinical process improvement model.                                                                                                                   |
| Robarts S, et al.                   | 2008;11:67–75           | United States   | <i>Healthc Q.</i>              | A framework for the development and implementation of an advanced practice role for physiotherapists that improves access and quality of care for patients.                                        |
| Rycroft-Malone J, et al.            | 2012;7 2012 Aug 30;7:80 | United Kingdom  | <i>Implement Sci.</i>          | A pragmatic cluster randomised trial evaluating three implementation interventions.                                                                                                                |
| Sandberg WS, et al.                 | 2008;106:192–201        | United States   | <i>Anesth Analg.</i>           | Real-time checking of electronic anesthesia records for documentation errors and automatically text messaging clinicians improves quality of documentation.                                        |
| Sedlack JD.                         | 2010;32:18–26           | United States   | <i>J Healthc Qual.</i>         | The utilization of Six Sigma and statistical process control techniques in surgical quality improvement.                                                                                           |
| Shukla PJ, Barreto SG, Nadkarni MS. | 2008;55:311–314         | India           | <i>Hepatogastroenterology.</i> | Application of Six Sigma towards improving surgical outcomes.                                                                                                                                      |

(continued on page AP8)

Appendix 4. References (continued)

| Author               | Year/ID            | Country        | Journal                              | Title                                                                                                                                                               |
|----------------------|--------------------|----------------|--------------------------------------|---------------------------------------------------------------------------------------------------------------------------------------------------------------------|
| Simunovic M, et al.  | 2010;182:1301–1306 | United States  | <i>CMAJ.</i>                         | The cluster-randomized Quality Initiative in Rectal Cancer trial: Evaluating a quality-improvement strategy in surgery.                                             |
| Sinanan M, et al.    | 2000;179:417–421   | United States  | <i>Am J Surg.</i>                    | Formula for surgical practice resuscitation in an academic medical center.                                                                                          |
| Skledar SJ, Goss PR. | 2000;35:53–64      | United States  | <i>Formulary.</i>                    | Using a CQI process to change surgical antimicrobial prophylaxis practices.                                                                                         |
| Smith CD, et al.     | 2013;216:559–568   | United States  | <i>J Am Coll Surg.</i>               | Re-engineering the operating room using variability methodology to improve health care value.                                                                       |
| Smith IR, et al.     | 2013;22:634–641    | Australia      | <i>Heart Lung Circ.</i>              | Performance monitoring in cardiac surgery: Application of statistical process control to a single-site database.                                                    |
| Smith MP, et al.     | 2008;109:25–35     | United States  | <i>Anesthesiology.</i>               | High-throughput operating room system for joint arthroplasties durably outperforms routine processes.                                                               |
| Stamou SC, et al.    | 2008;102:772–777   | United States  | <i>Am J Cardiol.</i>                 | Continuous quality improvement program and major morbidity after cardiac surgery.                                                                                   |
| Stamou SC, et al.    | 2008;136:494–499   | United States  | <i>J Thorac Cardiovasc Surg.</i>     | Quality improvement program decreases mortality after cardiac surgery.                                                                                              |
| Stanford J, et al.   | 2009;16:405–409    | United States  | <i>J Clin Outcomes Manag.</i>        | Improved cardiac surgical outcomes with use of total quality management.                                                                                            |
| Stevenson KS, et al. | 2007;94:376–381    | United Kingdom | <i>Br J Surg.</i>                    | Measurement of process as quality control in the management of acute surgical emergencies.                                                                          |
| Styer KA, et al.     | 2011;94:590–598    | United States  | <i>AORN J.</i>                       | Implementing the World Health Organization Surgical Safety Checklist: A model for future perioperative initiatives.                                                 |
| Sun TB, et al.       | 2011;167: 329–335  | Taiwan         | <i>J Surg Res.</i>                   | Quality improvements of antimicrobial prophylaxis in coronary artery bypass grafting.                                                                               |
| Taber DJ, et al.     | 2013;28:103–112    | United States  | <i>Am J Med Qual.</i>                | Improved patient safety and outcomes with a comprehensive interdisciplinary improvement initiative in kidney transplant recipients.                                 |
| Taner MT.            | 2013;26:768–785    | Turkey         | <i>Int J Health Care Qual Assur.</i> | Application of Six Sigma methodology to a cataract surgery unit.                                                                                                    |
| Thomas RJ, et al.    | 2013;33:212–219    | United States  | <i>J Cardiopulm Rehabil Prev.</i>    | Short- and long-term impact of an inpatient quality improvement initiative: Results of the CABG-GAP Practice Improvement Project.                                   |
| Thomassen Ø, et al.  | 2010;54:1179–1184  | Norway         | <i>Acta Anaesthesiol. Scand.</i>     | The effect of a simple checklist on frequent pre-induction deficiencies.                                                                                            |
| Tillman M, et al.    | 2013;184:150–156   | United States  | <i>J Surg Res.</i>                   | Surgical Care Improvement Project and surgical site infections: Can integration in the Surgical Safety Checklist improve quality performance and clinical outcomes? |
| Toledo AH, et al.    | 2013;23:350–364    | United States  | <i>Prog Transplant.</i>              | Reducing liver transplant length of stay: A Lean Six Sigma approach.                                                                                                |

(continued on page AP9)



Appendix 4. References (continued)

| Author                           | Year/ID            | Country         | Journal                                  | Title                                                                                                                                                     |
|----------------------------------|--------------------|-----------------|------------------------------------------|-----------------------------------------------------------------------------------------------------------------------------------------------------------|
| Torkki PM, et al.                | 2006;22:255–260    | Finland         | <i>Int J Technol Assess Health Care.</i> | Managing urgent surgery as a process: Case study of a trauma center.                                                                                      |
| Touijer K, et al.                | 2006;49:853–858    | United States   | <i>Eur Urol.</i>                         | Impact of a multidisciplinary continuous quality improvement program on the positive surgical margin rate after laparoscopic radical prostatectomy.       |
| van der Slegt J, et al.          | 2013;8(8):e71566   | The Netherlands | <i>PLoS One.</i>                         | Implementation of a bundle of care to reduce surgical site infections in patients undergoing vascular surgery.                                            |
| van Kasteren ME, et al.          | 2005;56:1094–1102  | The Netherlands | <i>J Antimicrob Chemother.</i>           | Quality improvement of surgical prophylaxis in Dutch hospitals: Evaluation of a multi-site intervention by time series analysis.                          |
| van Tiel FH, et al.              | 2006;62:64–70      | The Netherlands | <i>J Hosp Infect.</i>                    | Plan-do-study-act cycles as an instrument for improvement of compliance with infection control measures in care of patients after cardiothoracic surgery. |
| Vetter TR, Ali NM, Boudreaux AM. | 2012;38:490–496    | United States   | <i>Jt Comm J Qual Patient Saf.</i>       | A case-control study of an intraoperative corneal abrasion prevention program: Holding the gains made with a continuous quality improvement effort.       |
| Vogel P, et al.                  | 2011;396:1009–1015 | Germany         | <i>Langenbecks Arch Surg.</i>            | Morbidity and Mortality conference as part of PDCA cycle to decrease anastomotic failure in colorectal surgery.                                           |
| Warner CJ, et al.                | 2013;58:1417–1422  | United States   | <i>J Vasc Surg.</i>                      | Lean principles optimize on-time vascular surgery operating room starts and decrease resident work hours.                                                 |
| Warren CS, et al.                | 2011;43:58–63      | United States   | <i>J Extra Corpor Technol.</i>           | Variation in arterial inflow temperature: A regional quality improvement project.                                                                         |
| Weinberg M, et al.               | 2001;161:2357–2365 | Colombia        | <i>Arch Intern Med.</i>                  | Reducing infections among women undergoing cesarean section in Colombia by means of continuous quality improvement methods.                               |
| Wick EC, et al.                  | 2012;215:193–200   | United States   | <i>J Am Coll Surg.</i>                   | Implementation of a surgical comprehensive unit-based safety program to reduce surgical site infections.                                                  |
| Windle PE, et al.                | 2001;6:38–46       | United States   | <i>Lippincotts Case Manag.</i>           | A COMIT model utilization to improve first-case start time.                                                                                               |
| Wren SM, et al.                  | 2010;210:491–495   | United States   | <i>J Am Coll Surg.</i>                   | Postoperative pneumonia-prevention program for the inpatient surgical ward.                                                                               |
| Zack J.                          | 2008;36:S176.e1–2  | United States   | <i>Am J Infect Control.</i>              | Zeroing in on zero tolerance for central line-associated bacteremia.                                                                                      |

**Appendix 5. Example of Fully Complete Template for Intervention Description and Replication (TIDieR) Checklist Items\***

| 1                                                                                                                                                                                                                                                                                                                                                                                 | 2                                                                                                                                                                                                                                                                                                   | 3                                                                                                                                                                                                                                                                                                                                                                 | 4                                                                                                                                                                                                                                                                                                                                                                                                | 5                                                                                                                                                                                                                                                                                                                                                                          | 6                                                                                                                                                                                                                                                |
|-----------------------------------------------------------------------------------------------------------------------------------------------------------------------------------------------------------------------------------------------------------------------------------------------------------------------------------------------------------------------------------|-----------------------------------------------------------------------------------------------------------------------------------------------------------------------------------------------------------------------------------------------------------------------------------------------------|-------------------------------------------------------------------------------------------------------------------------------------------------------------------------------------------------------------------------------------------------------------------------------------------------------------------------------------------------------------------|--------------------------------------------------------------------------------------------------------------------------------------------------------------------------------------------------------------------------------------------------------------------------------------------------------------------------------------------------------------------------------------------------|----------------------------------------------------------------------------------------------------------------------------------------------------------------------------------------------------------------------------------------------------------------------------------------------------------------------------------------------------------------------------|--------------------------------------------------------------------------------------------------------------------------------------------------------------------------------------------------------------------------------------------------|
| Brief Name                                                                                                                                                                                                                                                                                                                                                                        | WHY: Rationale                                                                                                                                                                                                                                                                                      | WHAT: Materials                                                                                                                                                                                                                                                                                                                                                   | WHAT: Procedures                                                                                                                                                                                                                                                                                                                                                                                 | WHO: Staff Group, Level of Training & Expertise                                                                                                                                                                                                                                                                                                                            | HOW: Mode of Delivery                                                                                                                                                                                                                            |
| “multifaceted systems intervention” (p. 2014).                                                                                                                                                                                                                                                                                                                                    | To determine whether a multifaceted systems intervention would eliminate catheter-related bloodstream infections                                                                                                                                                                                    | Web-based training module ( <a href="http://www.hopkins-medicine.org.heic/">http://www.hopkins-medicine.org.heic/</a> ), a standardized checklist to be used during central venous catheter insertion, a daily goals form, a central catheter insertion cart with four drawers and partitions to organize the contents, which can be rolled to the patient’s room | Five interventions, including “empowering nurses to stop the procedure if guidelines were not followed” (p. 2016). An example of reporting item 4 (procedure) for this intervention is: “we discussed with both residents and nurses that the nurse should page the SICU attending physician if the resident, after the nurse identifies a violation, fails to correct the violation” (p. 2016). | “An interdisciplinary team including the SICU codirectors, ICU physicians, nurses, and infection control practitioners” (p. 2015). Additional information about how the QI team worked together included: “The SICU leadership met with both groups of providers and emphasized our focus on patient safety and teamwork” (p. 2018).                                       | “All physicians or physician extenders who insert central catheters were required to complete a Web-based training module and successfully complete a ten-question test before they were allowed to insert a central venous catheter” (p. 2016). |
| 7                                                                                                                                                                                                                                                                                                                                                                                 | 8                                                                                                                                                                                                                                                                                                   | 9                                                                                                                                                                                                                                                                                                                                                                 | 10                                                                                                                                                                                                                                                                                                                                                                                               | 11                                                                                                                                                                                                                                                                                                                                                                         |                                                                                                                                                                                                                                                  |
| WHERE: Setting + Infrastructure                                                                                                                                                                                                                                                                                                                                                   | WHEN & HOW MUCH: Dose/Duration                                                                                                                                                                                                                                                                      | Modifications                                                                                                                                                                                                                                                                                                                                                     | HOW WELL: (Planned)                                                                                                                                                                                                                                                                                                                                                                              | HOW WELL: (Actual)                                                                                                                                                                                                                                                                                                                                                         |                                                                                                                                                                                                                                                  |
| The surgical ICU is a 16-bed unit for adult patients undergoing general, orthopedic, transplant, trauma, and vascular surgery. Extra features of the setting relevant to the intervention included “Hospital Epidemiology and Infection Control (HEIC) required leaders from hospital administration to . . . provide the SICU with the additional resources required” (p. 2018). | From January 1, 1998, through December 31, 2002, ALL those who insert central catheters were required to complete a Web-based training module (URL provided) and successfully complete a 10-question test. The checklist was implemented in two phases, which included a 2-week observation period. | The management of central venous catheters once they are inserted did not change during the study period, with the exception of the change in daily patient visits in the study SICU to ask whether catheters could be removed. Following a pilot test, the checklist was modified based on feedback received.                                                    | Residents were informed that a checklist was being used. This strategy allowed nurses to feel more comfortable intervening if they observed a violation, because they felt that an expectation had been set and as a result, they were less likely to have an uncomfortable encounter with a physician and they could stop the procedure if they saw a violation of evidence-based practice.     | An example of actual compliance with one of the five interventions: “During the first month, nursing completed the checklist for 38 procedures: eight (24%) for new central venous access, 30 (79%) for catheter exchanges over a wire, and three (8%) were emergent. A nursing intervention was required in 32% (12/38) of central venous catheter insertions” (p. 2017). |                                                                                                                                                                                                                                                  |

SICU, surgical ICU; QI, quality improvement.

\* Adapted from Berenholtz SM, et al. Eliminating catheter-related bloodstream infections in the intensive care unit. *Crit Care Med.* 2004;32:2014–2020 (reference 60, page 206).
